# Supplementary material for: Risk Factors and Nomogram for Predicting Relapse Risk in Pediatric Neuromyelitis Optica Spectrum Disorders
Source: Front Immunol. 2022 Feb 18;13:765839. doi: 10.3389/fimmu.2022.765839 (PMC8894181; doi:10.3389/fimmu.2022.765839)
Supplement: Supplementary file 3 [file Table_3.xlsx]

## Sheet: Sheet1
Table S3 Risk factors of brain/brainstem symptom relapse using univariate and multivariate logistic regression in one-year follow up
	Univariate analysis		Multivariate analysis
Variable	OR (95% CI)	P value	OR (95% CI)	P value
Gender
Female	0.929 (0.340-2.539)	0.885	─	─
Male	Ref		─	─
Age	0.884 (0.778-1.004)	0.057	─	─
Antibody status
AQP4 antibody positive	0.713 (0.260-1.955)	0.511	─	─
AQP4 antibody negative	Ref		─	─
ARR pre-treatment	2.233 (0.733-6.808)	0.158	─	─
Visual disability at onset
Yes	0.964 (0.284-3.270)	0.953	─	─
No	Ref		─	─
Pre-treatment EDSS	1.299 (1.031-1.637)	0.027*	1.506 (1.106-2.051)	0.009**
Discharge EDSS	1.493 (1.056-2.110)	0.023*	─	─
Attack at onset
ON
Yes	0.623 (0.228-1.702)	0.357	─	─
No	Ref		─	─
TM
Yes	1.200 (0.416-3.458)	0.739	─	─
No	Ref		─	─
Brain/brainstem
Yes	4.909 (1.229-19.606)	0.024*	8.950 (1.367-58.577)	0.022*
No	Ref		Ref
Mixed lesion#
Yes	2.171 (0.756-6.235)	0.15	─	─
No	Ref		─	─
Counts of concomitant auto-antibodies§
≥1	2.397 (0.875-6.570)	0.089	─	─
˂1	Ref		─	─
Counts of concomitant auto-antibodies§
≥2	1.190 (0.400-3.544)	0.754	─	─
˂2	Ref		─	─
CSF protein level	0.199 (0.015-2.610)	0.219	─	─
CSF white cell count	0.993 (0.981-1.005)	0.262	─	─
CSF IgG	0.985 (0.964-1.007)	0.181	─	─
CSF IgM	0.863 (0.693-1.075)	0.19	─	─
Acute therapy
High-dose steroid + IVIg	0.469 (0.122-1.799)	0.269	─	─
IVIg	3.125 (0.278-35.157)	0.356	─	─
High-dose steroid	0.260 (0.056-1.201)	0.085	0.092 (0.013-0.671)	0.019*
Not with high-dose steroid/optimal IVIg	Ref		Ref
Maintenance therapy
Tapering oral steroid+MMF	0.818 (0.106-6.337)	0.848	─	─
Tapering oral steroid+AZA	0.156 (0.024-1.001)	0.05	─	─
Tapering oral steroid only	0.402 (0.120-1.349)	0.14	─	─
Inadequate treatment	Ref
PB B cell count	0.989 (0.952-1.029)	0.591	─	─
PB NK cell count	0.952 (0.901-1.006)	0.081	─	─
PB CD4+ cell count	1.004 (0.958-1.053)	0.857	─	─
PB CD8+ cell count	1.035 (0.969-1.106)	0.302	─	─
PB CD4+/CD8+	0.804 (0.382-1.693)	0.567	─	─
*P˂0.05;**P˂0.01;***P˂0.001
§Including antinuclear antibody, extractable nuclear antigen antibody, double-stranded DNA antibody, antineutrophil cytoplasmic antibody, anticardiolipin antibody,Sjögren syndrome A antibody,Sjögren syndrome B antibody,rheumatoid factor,anti-oipA antibody,thyroglobulin antibody and thyroid peroxidase antibody
#Including ON+TM, ON+cerebrum/brainstem, TM+cerebrum/brainstem and ON+TM+cerebrum/brainstem
AQP4,aquaporin-4; MOG,myelin oligodendrocyte glycoprotein; ON,optic neuritis; TM,transverse myelitis; EDSS,Expanded Disability Status Scale; IVIG, intravenous immunoglobin; MMF, mycophenolate mofetil; AZA, azathioprine )
